# Supplementary material
Source: PubMed Central journal article supplement (PMC5055810)
Supplement: NIHMS70154-supplement-Supplementary_figures.pdf [file NIHMS70154-supplement-Supplementary_figures.pdf]

Supplementary figures

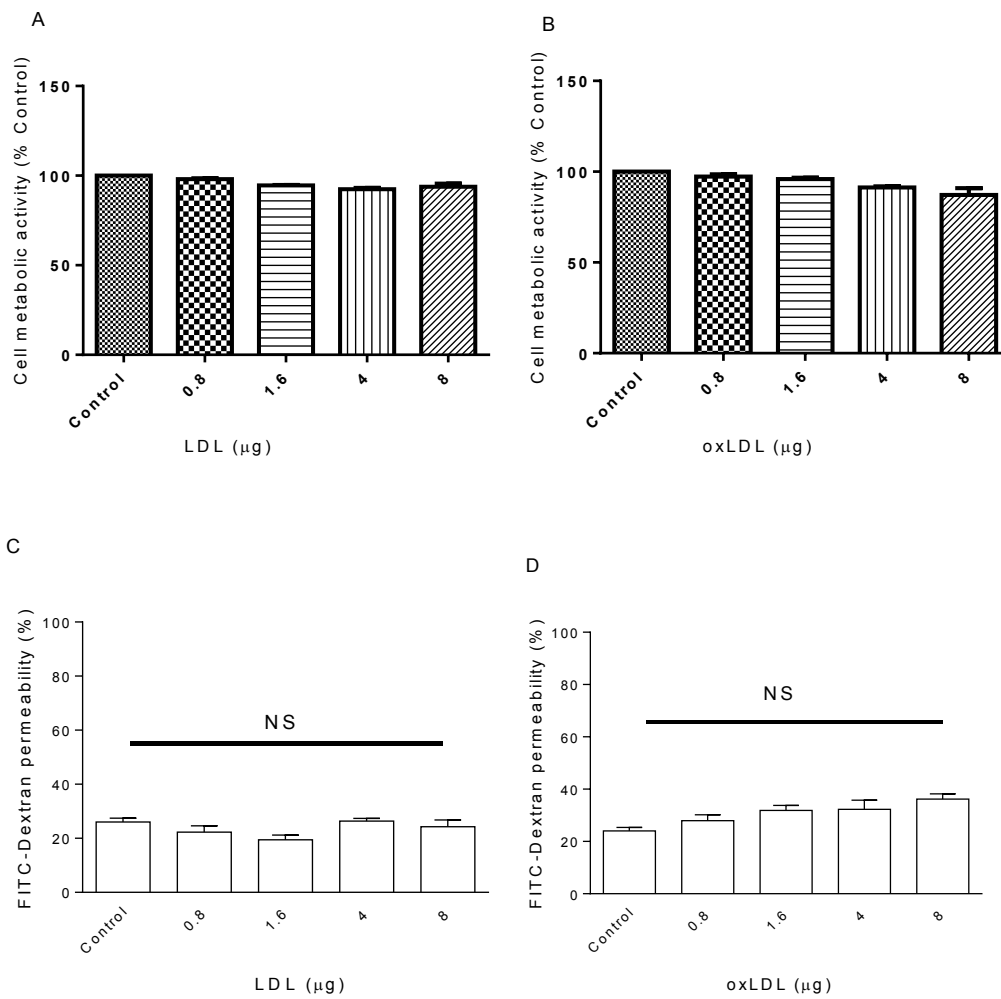

**Figure 1: The effect of LDL- and oxLDL on endothelial cell metabolic activity.** HMVEC cells ( $1 \times 10^5$  cells) treated with increasing concentrations of LDL or oxLDL (0.8-8  $\mu\text{g}$ ) for 24 hours. Cell metabolic activity was measured by CellTiter-Blue® assay (A and B). Barrier tightness was measured by FITC dextran permeability (C and D) n=3 independent experiments, NS=not significant.

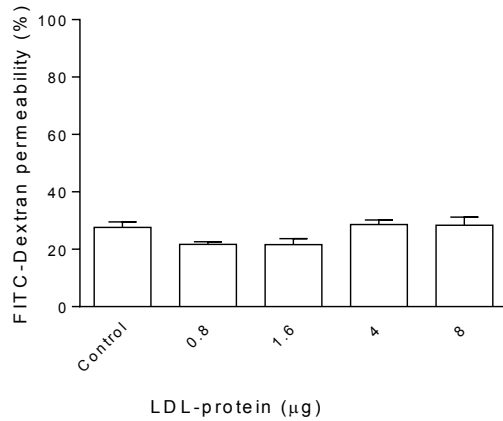

**Figure 2: The effect of LDL-protein on endothelial cell permeability.** HMVEC cells ( $1 \times 10^5$  cells) treated with increasing concentrations of LDL protein (0.8-8μg) for 24 hours. Barrier tightness was measured by FITC dextran permeability. n=3 independent experiments.

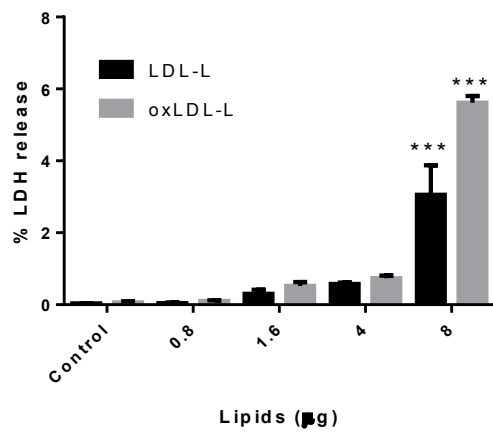

**Figure 3: LDH activity in HMVEC cell supernatants treated with LDL-L and oxLDL-L.** HMVEC cells ( $1 \times 10^5$  cells) were seeded in transwell inserts for 2 weeks before lipid treatments. HMVEC were treated with increasing concentrations of LDL-lipids and oxLDL-lipids for 24 hours. Cell supernatants were collected and analysed for LDH activity. \*\*\* P<0.001, n=3 independent experiments.

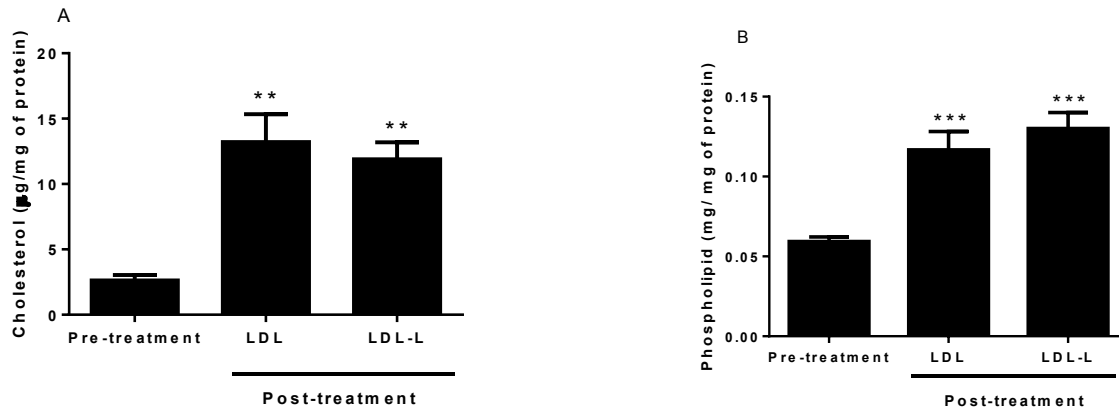

**Figure 4: Lipid uptake by HMVEC cells.** HMVEC cells ( $1 \times 10^5$  cells) were seeded in transwell inserts for 2 weeks before lipid treatments. Total cholesterol levels (A) and phospholipid (B) levels in HMVEC cell lysates were analysed pre- and post-treatment with  $4 \mu\text{g}$  lipids for 24 hours. \*\*\*  $P < 0.001$ ,  $n = 3$  independent experiments.

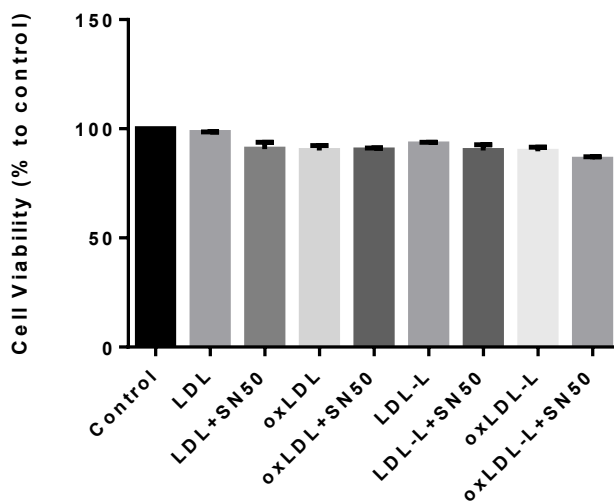

**Figure 5: The effect of NfκB inhibitory peptide SN50 on endothelial cell viability.** HMVEC were co-incubated with lipid fractions of LDL and oxLDL in the presence or absence of  $20 \mu\text{M}$  SN-50. Cell viability was measured by CellTiter-Blue assay.  $n = 3$  independent experiments.
